# Supplementary material
Source: MDPI journal article supplement (https://www.mdpi.com/2079-6412/9/5/311)

# Supplementary Materials: Chemical Modification of Novel Glycosidases from *Lactobacillus plantarum* Using Hyaluronic Acid: Effects on High Specificity against 6-Phosphate Glucopyranoside

Carlos Perez-Rizquez <sup>1</sup>, David Lopez-Tejedor <sup>1</sup>, Laura Plaza-Vinuesa <sup>2</sup>, Blanca de las Rivas <sup>2</sup>, Rosario Muñoz <sup>2</sup>, Jose Cumella <sup>3</sup> and Jose M. Palomo <sup>1,\*</sup>

<sup>1</sup> Department of Biocatalysis, Institute of Catalysis (CSIC), Marie Curie 2, Campus UAM, Cantoblanco, E-28049 Madrid, Spain; c.p.rizquez@csic.es (C.P.-R.); david.lopez@csic.es (D.L.-T.)

<sup>2</sup> Department of Microbial Biotechnology, Institute of Food Science, Technology and Nutrition (ICTAN-CSIC), José Antonio Novais 10, 28040 Madrid, Spain; laura.plaza@ictan.csic.es (L.P.-V.); blanca.r@csic.es (B.d.l.R.); r.munoz@csic.es (R.M.)

<sup>3</sup> Institute of Medicinal Chemistry (CSIC), Juan de la Cierva 3, E-28006 Madrid, Spain; working\_jose@hotmail.com

\* Correspondence: josempalomo@icp.csic.es; Tel.: +34-91-585-4768

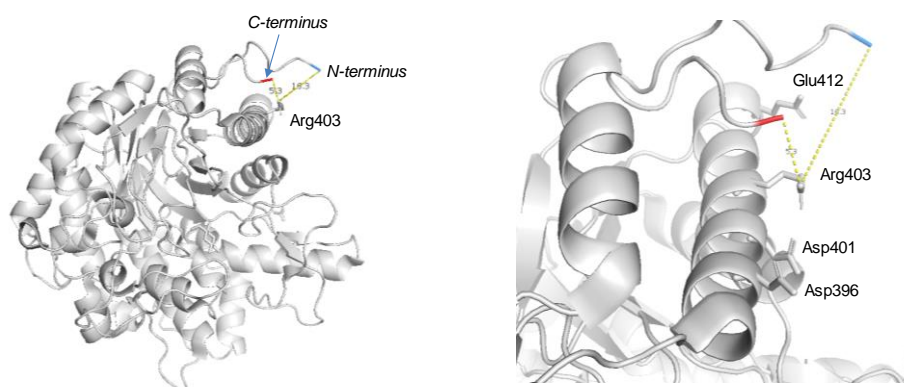

**Figure S1.** Lp\_0440 structure incorporating a His<sub>6</sub>-tag in the C-terminus. N-terminus is in light blue, C-terminus in red, and His<sub>6</sub>-tag in green. The protein structure was obtained from the Protein Data Bank (PDB code: 3qom) and the pictures were created using Pymol v. 0.99.

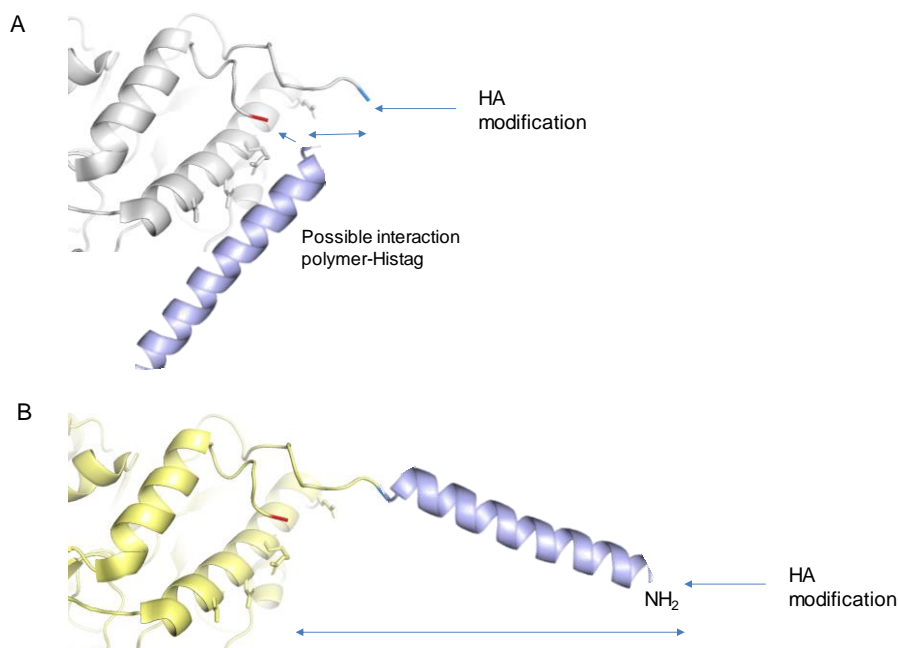

**Figure S2.** Differences on the hyaluronic acid (HA) chemical modification of glycosidases containing a His<sub>6</sub>-tag in the N- or C-terminus. **(A)** Lp\_0440 structure incorporating a His<sub>6</sub>-tag in the C-terminus. **(B)** Glycosidase (using Lp\_0440 structure as model) incorporating a His<sub>6</sub>-tag in the C-terminus. N-terminus is in light blue, C-terminus in red, and His<sub>6</sub>-tag in purple. The protein structure was obtained from the Protein Data Bank (PDB code: 3qom) and the pictures were created using Pymol v. 0.99.

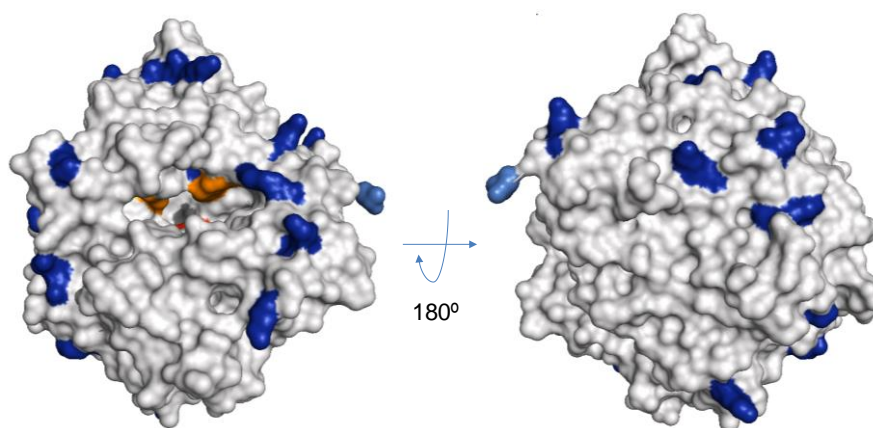

**Figure S3.** Lp\_0440 surface tridimensional structure. Lysines are marked in blue, N-terminus in light blue, Trp in orange, and active site in red. The protein structure was obtained from the Protein Data Bank (PDB code: 3qom) and the pictures were created using Pymol v. 0.99.

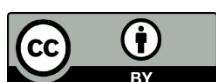

Supplement: s1 [file s1]
